# Supplementary material for: Living-Cell Diffracted X-ray Tracking Analysis Confirmed Internal Salt Bridge Is Critical for Ligand-Induced Twisting Motion of Serotonin Receptors
Source: MDPI journal article supplement (doi:10.3390/ijms22105285), 2021-05-17
Supplement: s1 [file s1]

## Supplementary Material

a

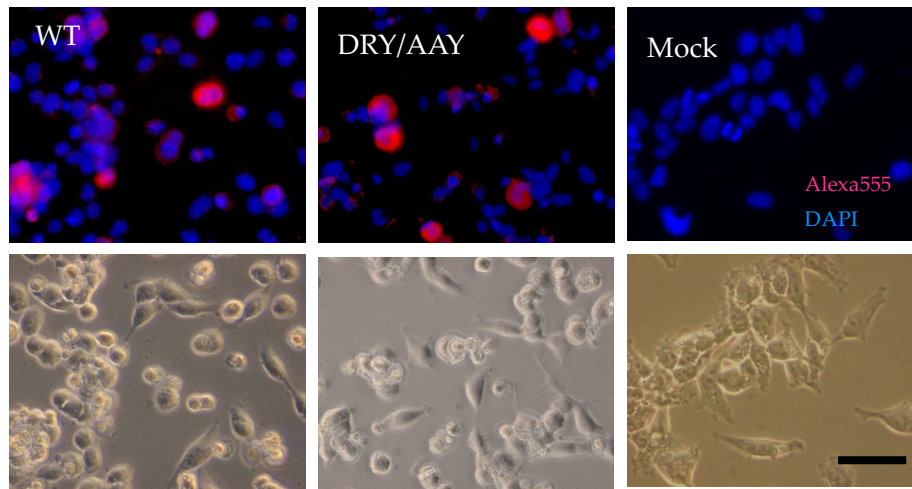

b

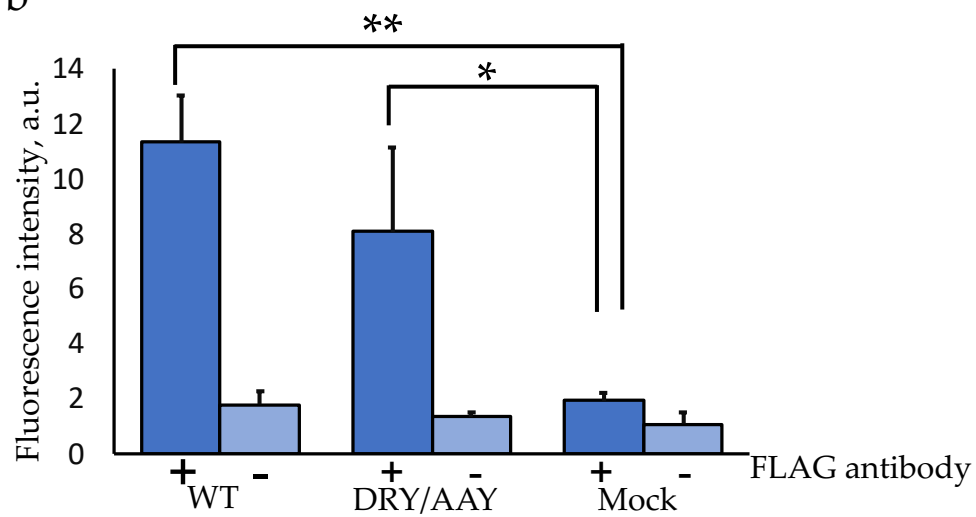

c

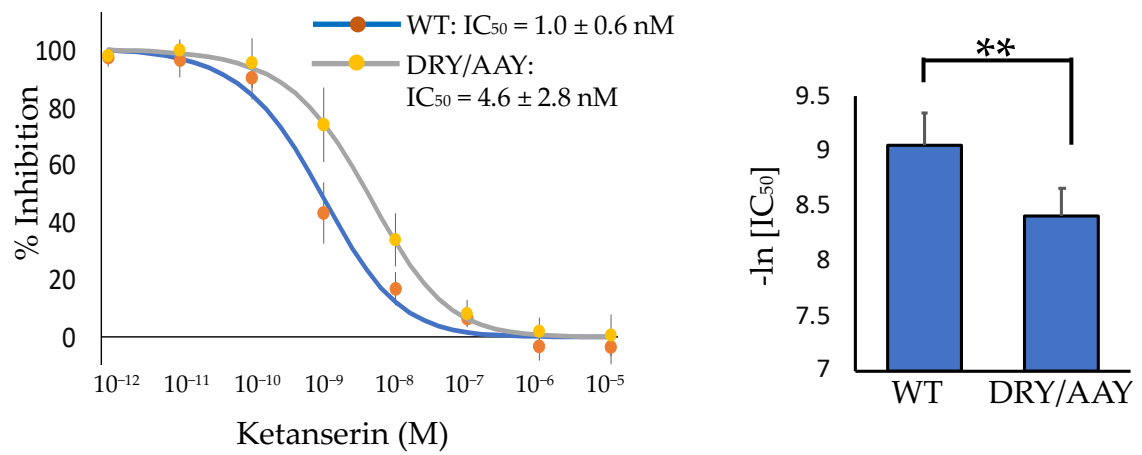

**Figure S1.** Expression and function of 5-HT<sub>2A</sub>R used in this experiment. **(a)** Expression of N-FLAG 5-HT<sub>2A</sub> receptors (WT) and DRY/AAY in HEK293 cells was confirmed by immunocytochemical studies using anti-FLAG antibodies. The cells were stained with monoclonal anti-FLAG M2 antibody (Sigma-Aldrich: F1804) followed by Alexa Fluor 555 anti-mouse IgG (Thermofisher: A31622). Both WT and DRY/AAY expressing cells were positive for FLAG antibodies. About 40% of the cells were positive for Alexa555 in this transient expression, while no positive cells were observed in the mock transfection. Lower panels: corresponding bright-field images. Scale bar, 50µm. **(b)** Live-cell based immunofluorescence assay. Living cells in suspension were labelled with anti-FLAG M2 antibody, followed by Alexa Fluor 488-conjugated secondary antibody (Thermofisher: A11001, Ex/Em = 493/519 nm). The fluorescence intensities were measured with a 96 well plate using the FlexStation 3 system. Both the intensities of WT and DRY/AAY were significantly higher than those of mock transfected cells, suggesting the expression of 5-HT<sub>2A</sub>R on the cell surface. Experiments without the primary FLAG antibody were presented as a negative control. Data are presented as mean values ± SD (standard deviation) from four different experiments. Two-tailed paired Student *t*-test *p*-values indicate statistical significance (\**p* < 0.05 and \*\**p* < 0.01). **(c)** Inhibition of α-MS induced calcium influx by ketanserin. HEK 293 cells transfected with WT or DRY/AAY were pretreated with ketanserin at 10<sup>-5</sup> – 10<sup>-12</sup> M, then calcium influx by 10µM α-MS was measured using the FlexStation 3 system with the FLIPR Calcium 6 reagent (Molecular Devices Inc.). The IC<sub>50</sub> were calculated to be 1.0 ± 0.6 nM for WT, and 4.6 ± 2.8 nM for DRY/AAY, respectively. Data are presented as mean ± SD from five different experiments. Right panel; concentration of ketanserin at IC<sub>50</sub> was analyzed by the Student *t*-test (\*\**p* < 0.01).

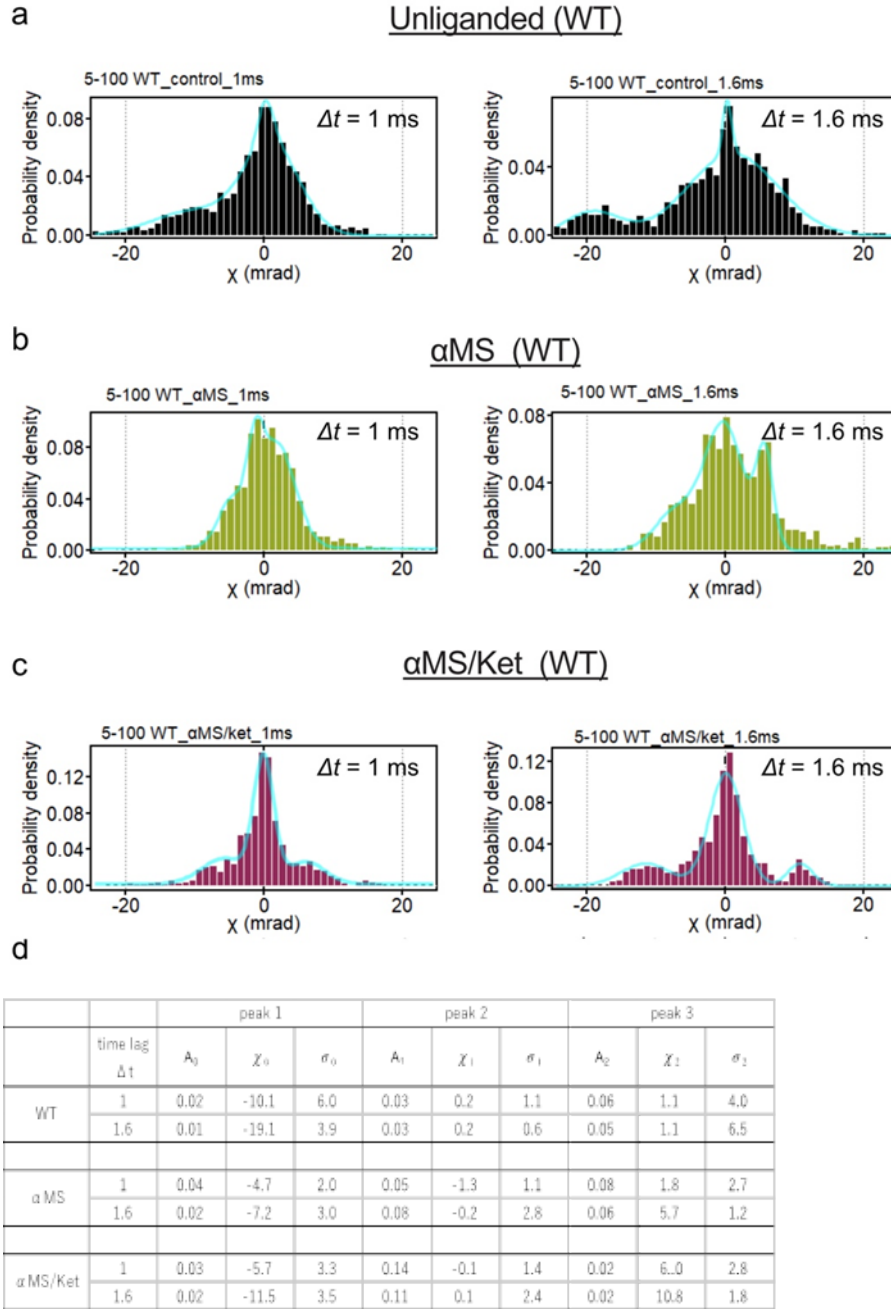

**Figure S2.** Three Gaussian curve fitting of distribution of angular displacement for wild type 5-HT<sub>2A</sub>R. **(a–c)** Distribution of the absolute angular displacement of the wild-type 5-HT<sub>2A</sub>R over an interval time  $t$  (left panels,  $\Delta t = 1$  ms, and right panels,  $\Delta t = 1.6$  ms) fitted by three Gaussian curves. **(d)** Statistical parameters for fitted curves. Curves were fitted with the following equation, where  $A$  represents amplitude,  $\chi$  represents angular displacement, and  $\sigma$  represents standard deviation.

$$f(\chi) = A_0 \exp\left(-\frac{(\chi - \chi_0)^2}{2\sigma_0^2}\right) + A_1 \exp\left(-\frac{(\chi - \chi_1)^2}{2\sigma_1^2}\right) + A_2 \exp\left(-\frac{(\chi - \chi_2)^2}{2\sigma_2^2}\right)$$

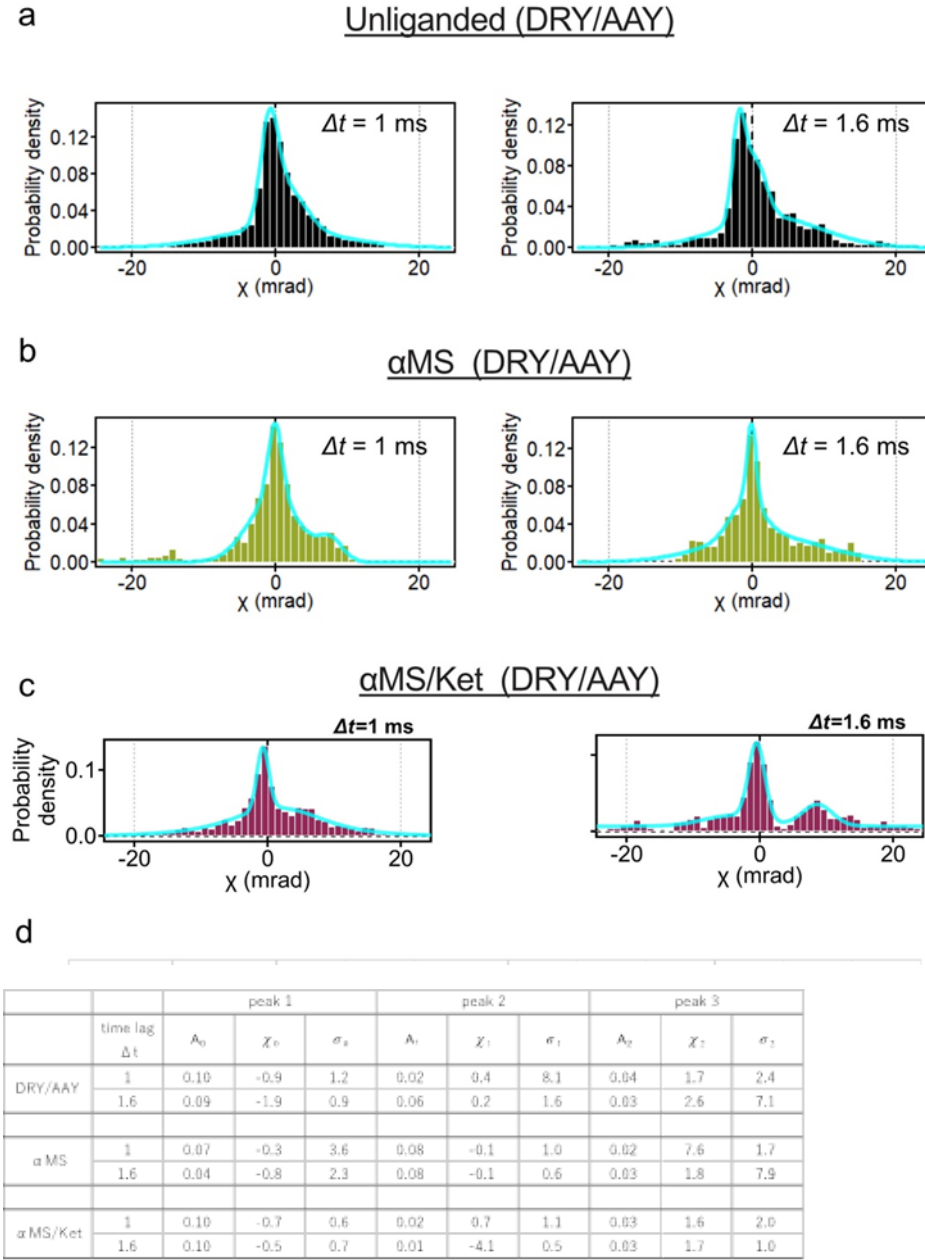

**Figure S3.** Three Gaussian curve fitting of distribution of angular displacement for DRY/AAY mutant 5-HT<sub>2A</sub>R. (a–c) Distribution of the absolute angular displacement of the DRY/AAY mutant 5-HT<sub>2A</sub>R over an interval time  $t$  (left panels,  $\Delta t = 1$  ms, and right panels,  $\Delta t = 1.6$  ms) fitted by three Gaussian curves. (d) Statistical parameters for fitted curves.

**Table S1.** Parameters of MSD curves for wild type 5-HT<sub>2A</sub>R. The MSD curves were fitted by the following function:  $\delta^2(t) = D_\alpha t^\alpha + 2\beta^2$  on the range of 0–4 ms.  $D_\alpha$  is the anomalous diffusion constant, a non-linear relationship to time,  $\alpha$  called subdiffusion ( $1 > \alpha > 0$ ) or superdiffusion ( $\alpha > 1$ ) and  $\beta$  called measurement error.

| <u>WT theta</u>                       |             |             |                 |
|---------------------------------------|-------------|-------------|-----------------|
|                                       | Ligand-free | $\alpha$ MS | $\alpha$ MS/ket |
| $D_\alpha$<br>(mrad <sup>2</sup> /ms) | 5.57        | 3.31        | 2.64            |
| $\alpha$                              | 0.99        | 0.84        | 0.46            |
| $\beta^2$<br>(mrad <sup>2</sup> )     | 0.003       | −0.001      | 0.003           |

  

| <u>WT kai</u>                         |             |             |                 |
|---------------------------------------|-------------|-------------|-----------------|
|                                       | Ligand-free | $\alpha$ MS | $\alpha$ MS/ket |
| $D_\alpha$<br>(mrad <sup>2</sup> /ms) | 66.6        | 32.2        | 37.8            |
| $\alpha$                              | 1.67        | 1.47        | 0.97            |
| $\beta^2$<br>(mrad <sup>2</sup> )     | 0.889       | 1.016       | 0.002           |

**Table S2.** Parameters for single Gaussian fitting. The probability density was fitted by the Gaussian function:  $f(x) = a \exp(-(x-\mu)^2/2\sigma^2)$ .

| <u>WT</u>        |                       |      |       |            |
|------------------|-----------------------|------|-------|------------|
|                  | Time interval<br>(ms) | a    | $\mu$ | $\sigma^2$ |
| Ligand free      | 1                     | 0.08 | 0.54  | 2.6        |
|                  | 1.6                   | 0.05 | 0.98  | 4.2        |
| $\alpha$ -MS     | 1                     | 0.10 | 0.08  | 2.7        |
|                  | 1.6                   | 0.07 | 0.36  | 4.0        |
| $\alpha$ -MS/ket | 1                     | 0.14 | -0.18 | 1.3        |
|                  | 1.6                   | 0.11 | 0.05  | 1.7        |

| <u>DRY/AAV</u> |                       |      |       |            |
|----------------|-----------------------|------|-------|------------|
|                | Time interval<br>(ms) | a    | $\mu$ | $\sigma^2$ |
| Ligand free    | 1                     | 0.13 | -0.14 | 1.8        |
|                | 1.6                   | 0.11 | -0.64 | 1.8        |
| $\alpha$ -MS   | 1                     | 0.12 | -0.20 | 1.6        |
|                | 1.6                   | 0.10 | -0.30 | 1.9        |
